# Supplementary material for: Using Baidu Search Index to Predict Dengue Outbreak in China
Source: PubMed Central journal article supplement (PMC5131307; doi:10.1038/srep38040), 2016-12-01
Supplement: srep38040-s1.pdf [file srep38040-s1.pdf]

## Supplementary Information

### Using Baidu Search Index to Predict Dengue Outbreak in China

**Kangkang Liu<sup>1,2,3</sup>, Tao Wang<sup>2,4</sup>, Zhicong Yang<sup>5</sup>, Xiaodong Huang<sup>3</sup>, Gabriel J Milinovich<sup>3,6</sup>, Yi Lu<sup>7</sup>, Qinlong Jing<sup>1,2,5</sup>, Yao Xia<sup>1,2</sup>, Zhengyang Zhao<sup>5</sup>, Yang Yang<sup>1,2,9</sup>, Shilu Tong<sup>3</sup>, Wenbiao Hu<sup>3\*</sup>, Jiahai Lu<sup>1,2,8\*</sup>**

<sup>1</sup> School of Public Health, Key Laboratory of Tropical Diseases Control of Ministry of Education, Sun Yat-Sen University, Guangzhou, P. R. China.

<sup>2</sup> Zhongshan Research Institute of Public Health, School of Public Health, Sun Yat-Sen University, Zhongshan, P.R China.

<sup>3</sup> School of Public Health and Social Work, Institute of Health and Biomedical Innovation, Queensland University of Technology, Brisbane, Australia.

<sup>4</sup> Zhongshan Center for Diseases Control and Prevention, Zhongshan, P.R China.

<sup>5</sup> Guangzhou Center for Disease Control and Prevention, Guangzhou, P.R China.

<sup>6</sup> School of Medicine, University of Queensland, Brisbane, Australia.

<sup>7</sup> School of Public Health, University at Albany, State University of New York, Albany, United States.

<sup>8</sup> Institute of Emergency Technology for Serious Infectious Diseases Control and Prevention, Guangdong Provincial Department of Science and Technology; Emergency Management Office, the People's Government of Guangdong Province, Guangzhou, P. R. China.

<sup>9</sup> The School of Food Science, Guangdong Pharmaceutical University, Guangzhou, P. R. China.

\* Correspondence and requests for materials should be addressed to J.L. (email: [lujiahai@mail.sysu.edu.cn](mailto:lujiahai@mail.sysu.edu.cn)) or W.H. (email: [w2.hu@qut.edu.au](mailto:w2.hu@qut.edu.au))

**Table S1 Cross-correlations between the weekly DF incidence rates and the weekly BSI for DF in Guangzhou and Zhongshan from 1 January 2010 to 31 December 2014.**

| Guangzhou      |                      |            | Zhongshan      |                      |            |
|----------------|----------------------|------------|----------------|----------------------|------------|
| Lag<br>(weeks) | Cross<br>Correlation | Std. Error | Lag<br>(weeks) | Cross<br>Correlation | Std. Error |
| 0              | 0.924*               | 0.062      | 0              | 0.698*               | 0.062      |
| 1              | 0.904*               | 0.062      | 1              | 0.658*               | 0.062      |
| 2              | 0.717*               | 0.062      | 2              | 0.647*               | 0.062      |
| 3              | 0.505*               | 0.062      | 3              | 0.533*               | 0.062      |
| 4              | 0.332*               | 0.062      | 4              | 0.489*               | 0.062      |
| 5              | 0.227*               | 0.063      | 5              | 0.437*               | 0.063      |
| 6              | 0.151*               | 0.063      | 6              | 0.369*               | 0.063      |
| 7              | 0.093                | 0.063      | 7              | 0.385*               | 0.063      |
| 8              | 0.052                | 0.063      | 8              | 0.407*               | 0.063      |
| 9              | 0.025                | 0.063      | 9              | 0.417*               | 0.063      |
| 10             | 0.006                | 0.063      | 10             | 0.373*               | 0.063      |
| 11             | -0.007               | 0.063      | 11             | 0.302*               | 0.063      |
| 12             | -0.013               | 0.063      | 12             | 0.215*               | 0.063      |
| 13             | -0.012               | 0.064      | 13             | 0.171*               | 0.064      |
| 14             | -0.011               | 0.064      | 14             | 0.136*               | 0.064      |
| 15             | -0.006               | 0.064      | 15             | 0.067                | 0.064      |
| 16             | -0.006               | 0.064      | 16             | 0.030                | 0.064      |
| 17             | -0.006               | 0.064      | 17             | 0.004                | 0.064      |
| 18             | -0.006               | 0.064      | 18             | -0.003               | 0.064      |
| 19             | -0.007               | 0.064      | 19             | -0.016               | 0.064      |
| 20             | -0.007               | 0.064      | 20             | -0.021               | 0.064      |

\*:  $P < 0.05$

**Table S2 DF incidence rate percentiles in Guangzhou and Zhongshan, China from 2010 to 2014.**

| Percentiles<br>(%) | Guangzhou<br>(1/10 <sup>5</sup> ) | Zhongshan<br>(1/10 <sup>5</sup> ) |
|--------------------|-----------------------------------|-----------------------------------|
| 25                 | 0.000                             | 0.000                             |
| 50                 | 0.000                             | 0.000                             |
| 75                 | 0.031                             | 0.000                             |
| 80                 | 0.056                             | 0.000                             |
| 85                 | 0.121                             | 0.063                             |
| 90                 | 0.476                             | 0.442                             |

**Table S3 Spearman's correlations between weekly DF incidence rates and weekly Baidu search query data in Guangzhou and Zhongshan, China from 1 January, 2010 to 31 December 2014.**

|        | DF incidence_GZ | DF incidence_ZS | BDI_GZ  | BDI_ZS  |
|--------|-----------------|-----------------|---------|---------|
| ADF_GZ | 1.000           | 0.763**         | 0.687** | 0.729** |
| ADF_ZS | 0.763**         | 1.000           | 0.607** | 0.800** |
| BSI_GZ | 0.687**         | 0.607**         | 1.000   | 0.064** |
| BSI_ZS | 0.729**         | 0.800**         | 0.604** | 1.000   |

\*\* :  $P < 0.01$

ADF\_GZ: Autochthonous DF in Guangzhou;

ADF\_ZS: Autochthonous DF in Zhongshan;

BSI\_GZ: Baidu DF search index in Guangzhou;

BSI\_ZS: Baidu DF search index in Zhongshan.

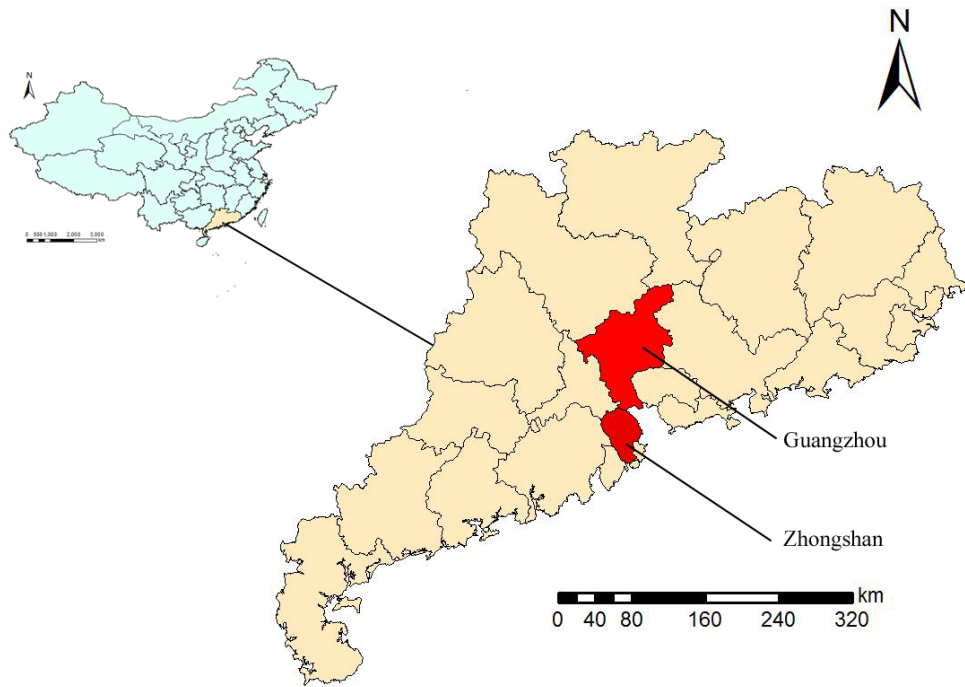

**Figure S1 Locations of Guangzhou and Zhongshan, Guangdong province, China.**  
(It was created with ArcGIS software version 10.3.1, <http://www.esri.com/software/arcgis>.)

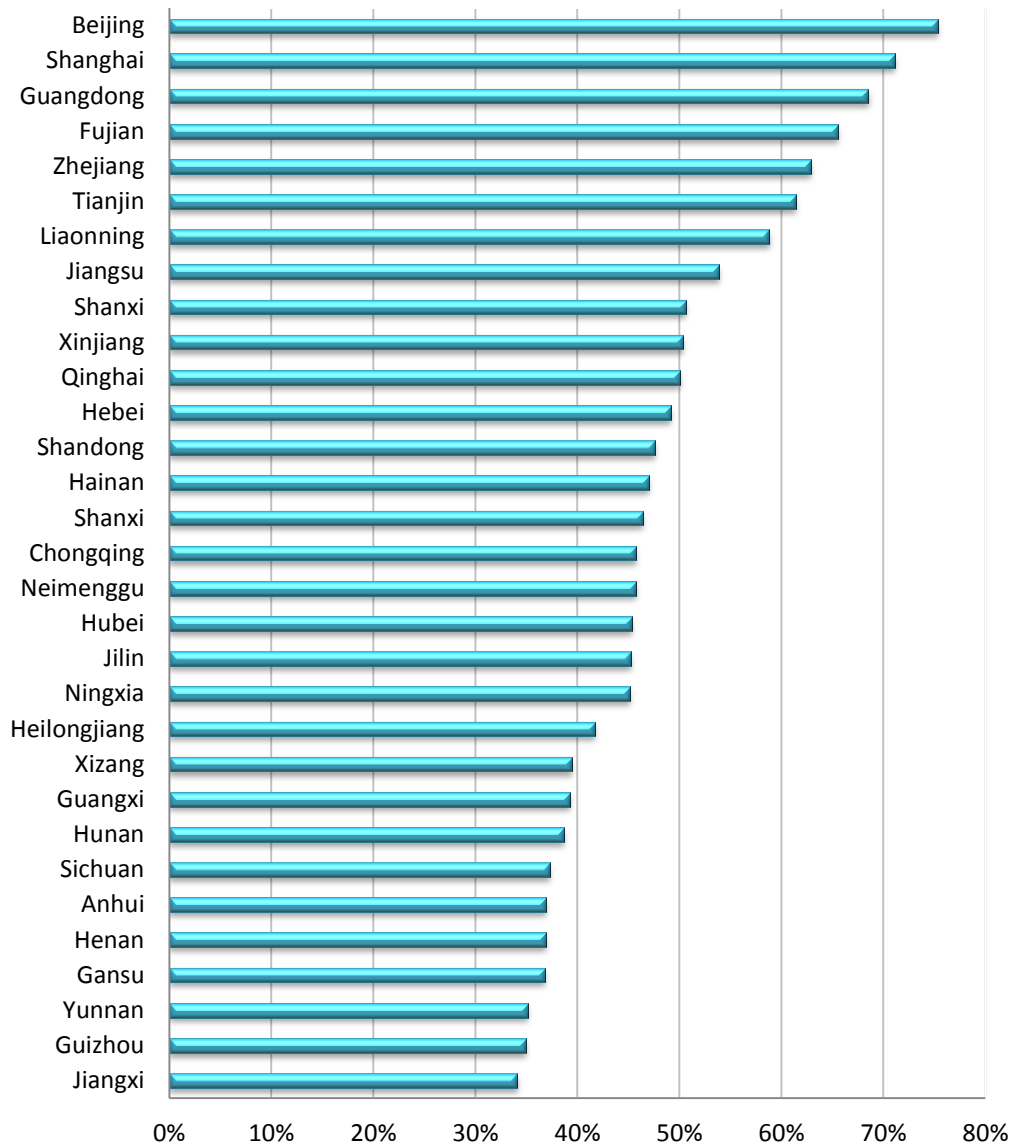

**Figure S2 Internet penetration rates in different province of China in 2014.**
